# Supplementary material for: Strain-induced structural phase transition, electric polarization and unusual electric properties in photovoltaic materials CsMI3 (M = Pb, Sn)
Source: Royal Society of Chemistry journal article supplement (doi:10.1039/c9ra10791f), 2020-01-01
Supplement: c9ra10791f1.pdf [file c9ra10791f1.pdf]

## Supplementary Information Material

### Strain-induced structural phase transition, electric polarization and unusual electric properties in photovoltaic materials CsMI<sub>3</sub> (M = Pb, Sn)

Xiao-Rong Cheng,<sup>1,a</sup> Xiao-Yu Kuang,<sup>1,a</sup> Hao Cheng,<sup>1</sup> Hao Tian,<sup>2,3,\*</sup> Si-Min Yang,<sup>1</sup> Miao Yu,<sup>1</sup>  
Xi-Long Dou,<sup>1</sup> and Ai-Jie Mao,<sup>1,\*</sup>

<sup>1</sup> *Institute of Atomic and Molecular Physics, Sichuan University, Chengdu 610065, China*

<sup>2</sup> *National Laboratory of Solid State Microstructures and Collaborative Innovation Center of Advanced Microstructures,*

*Department of Materials Science and Engineering, Nanjing University, Nanjing 210093, China*

<sup>3</sup> *Jiangsu Key Laboratory of Artificial Functional Materials, Nanjing University, Nanjing 210093, China*

a) Authors contributed equally to this work.

b) Electronic mail: [tiao2007@126.com](mailto:tiao2007@126.com) (Hao Tian),  
[scu\\_mij@126.com](mailto:scu_mij@126.com) (Ai-Jie Mao).

The goal of this Supplementary Information Material is to provide more information by means of Figures.

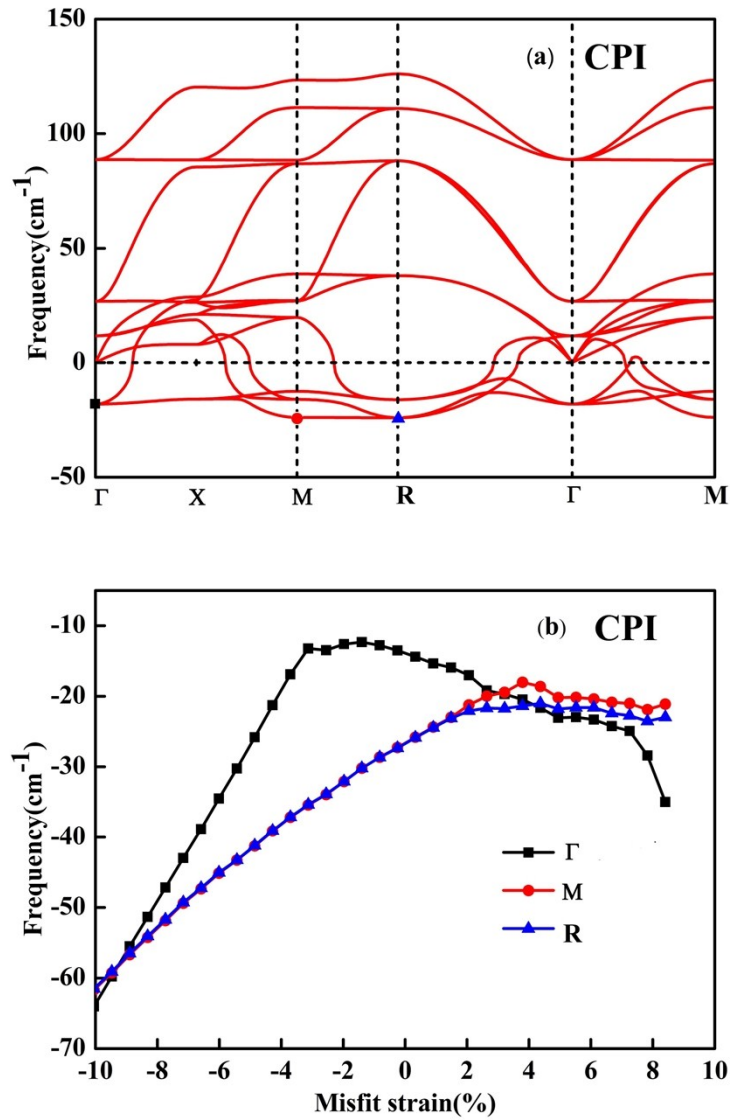

**Fig. S1** (a) The Phonon dispersions curves of the ideal cubic structure  $\text{CsPbI}_3$  within the density functional perturbation theory, where the three main unstable phonon frequencies are marked by the black, red, and blue points. (b) The unstable phonon frequencies in panel (a) vs as a function of misfit strain. Note that the symmetry in panel (b) is lowered to  $P4/mmm$  by strain effect.

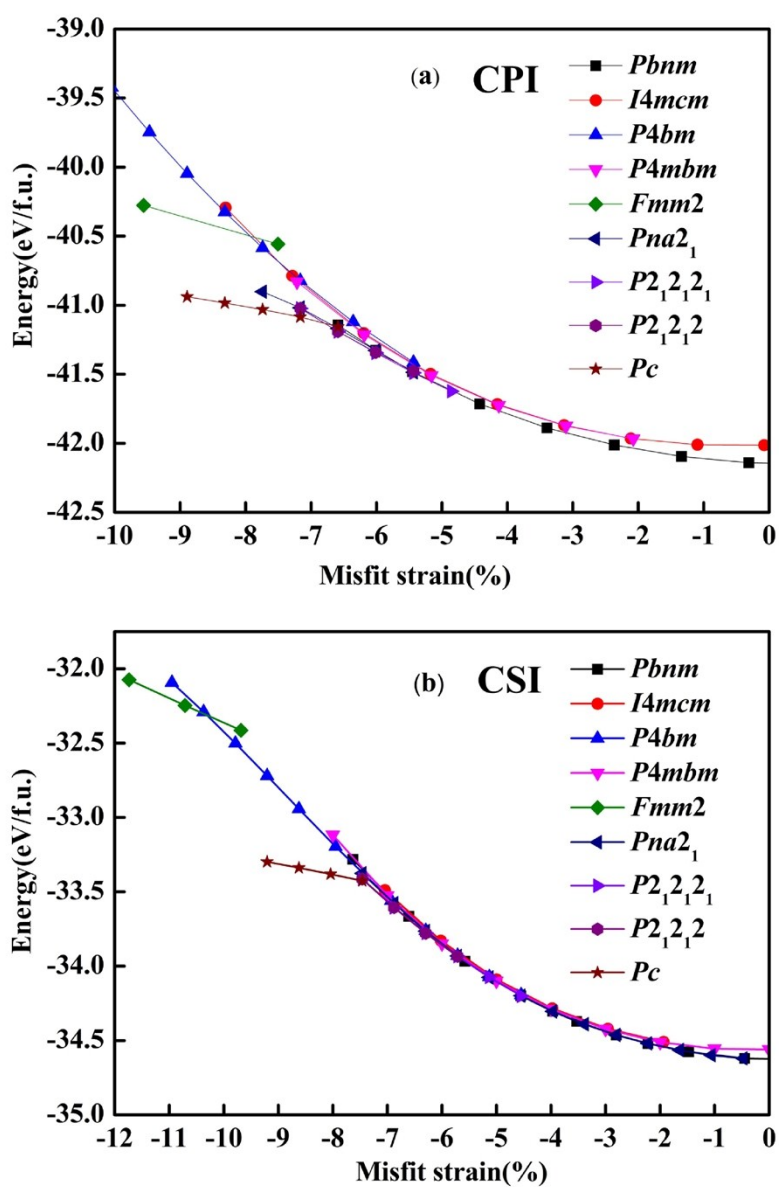

**Fig. S2** The total energy of all phases contained metastable phases vs misfit strain in the (001) epitaxial CPI and CSI thin films.

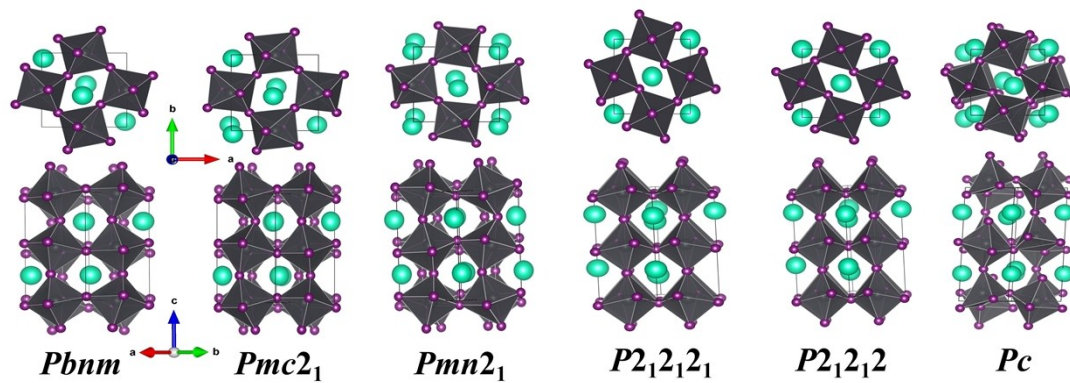

**Fig. S3** Schematic description of six different phases  $Pbnm$ ,  $Pmc2_1$ ,  $Pmn2_1$ ,  $P2_12_12_1$ ,  $P2_12_12$ , and  $Pc$  phases for CPI films. The green and purple balls represent Cs atoms and I atoms, respectively.

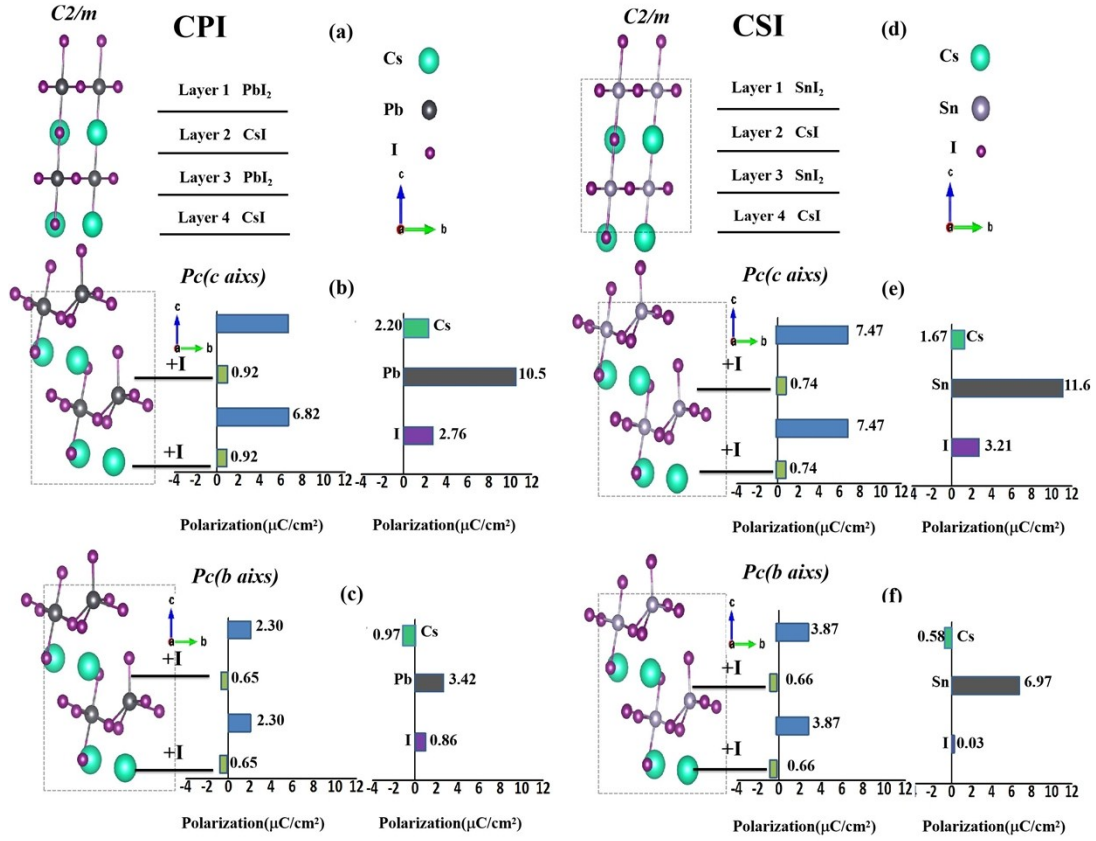

**Fig. S4** The layer-decomposed polarization in corresponding strained phases for CPI and CSI. Panel (a) and (d) display the schematic configuration of the centrosymmetric  $C2/m$  structure for CPI and CSI, respectively. Panel (b), (c), (e) and (f) represent the layer-decomposed polarization in  $Pc$  phase along  $c$ ,  $b$  axis, respectively.

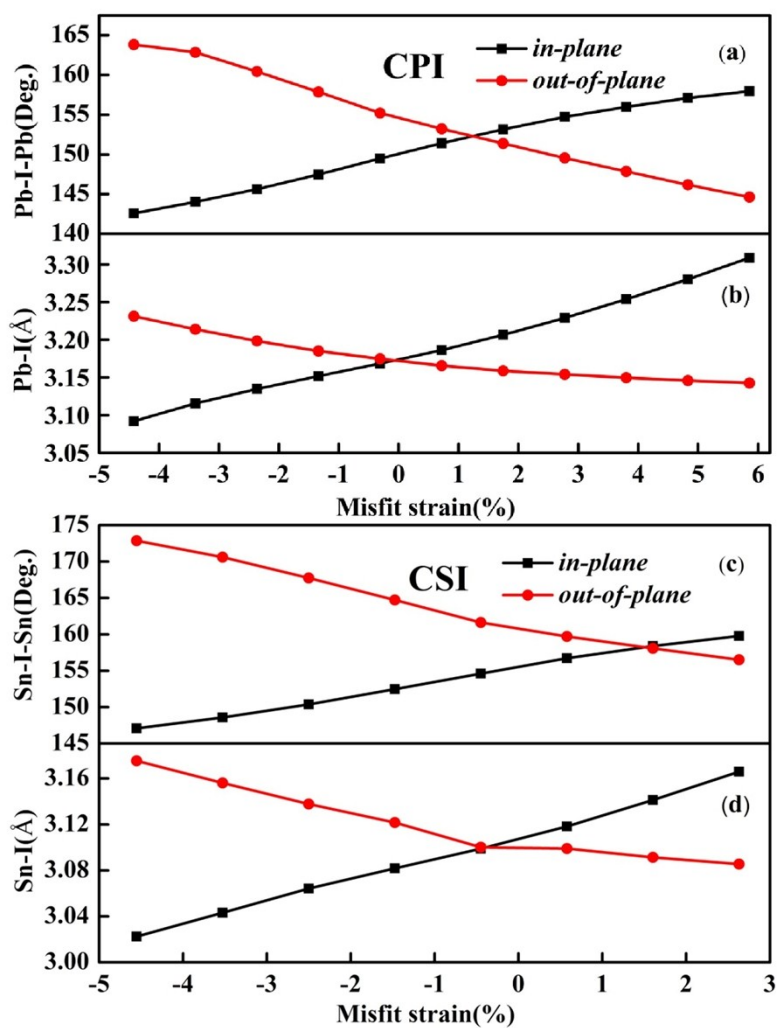

**Fig. S5** Bond angles and bond lengths of *Pbnm* state of  $\text{CsPbI}_3$  and  $\text{CsSnI}_3$  thin films under misfit strain. (Bond angles represent  $\text{Pb-I-Pb}$ ,  $\text{Sn-I-Sn}$ , respectively. Bond lengths represent  $\text{Pb-I}$ ,  $\text{Sn-I}$ , respectively).
